# Supplementary material
Source: publisher site journal article supplement (https://www.spandidos-publications.com/3199/downloadSupplementary)
Supplement: Supplementary file 1 [file downloadSupplementary]

## Sheet: KEGG-downregulation
Table SVII. Enrichment of target genes of downregulated microRNAs based on KEGG pathways.
Pathway ID	Pathway description	Observed gene count	False discovery rate	Matching proteins in network (IDs)	Matching proteins in network (labels)
4510	Focal adhesion	15	9.5e-14	ENSRNOP00000003077,ENSRNOP00000004956,ENSRNOP00000005073,ENSRNOP00000005311,ENSRNOP00000005995,ENSRNOP00000008722,ENSRNOP00000012334,ENSRNOP00000014785,ENSRNOP00000019267,ENSRNOP00000026637,ENSRNOP00000027773,ENSRNOP00000027897,ENSRNOP00000028143,ENSRNOP00000054197,ENSRNOP00000054270	Actn4,Cav2,Col1a1,Col3a1,Col4a1,Col4a2,Col5a1,Col5a2,Col5a3,Igf1,Igf1r,Itgb1,Pdgfra,Pten,Vegfa
4151	PI3K-Akt signaling pathway	16	2.74e-12	ENSRNOP00000003077,ENSRNOP00000004956,ENSRNOP00000005073,ENSRNOP00000005311,ENSRNOP00000005995,ENSRNOP00000006188,ENSRNOP00000012334,ENSRNOP00000014785,ENSRNOP00000016942,ENSRNOP00000019267,ENSRNOP00000026637,ENSRNOP00000027897,ENSRNOP00000028143,ENSRNOP00000040411,ENSRNOP00000054197,ENSRNOP00000054270	Col1a1,Col3a1,Col4a1,Col4a2,Col5a1,Col5a2,Col5a3,Csf1r,Igf1,Igf1r,Itgb1,Myc,Pdgfra,Pten,Syk,Vegfa
5200	Pathways in cancer	15	2.11e-11	ENSRNOP00000003077,ENSRNOP00000005995,ENSRNOP00000006188,ENSRNOP00000012137,ENSRNOP00000014785,ENSRNOP00000019267,ENSRNOP00000022679,ENSRNOP00000023878,ENSRNOP00000026637,ENSRNOP00000026760,ENSRNOP00000028143,ENSRNOP00000040411,ENSRNOP00000042230,ENSRNOP00000054197,ENSRNOP00000054270	Col4a1,Col4a2,Csf1r,Hif1a,Igf1,Igf1r,Itgb1,Mmp2,Myc,Pdgfra,Pparg,Pten,Stat3,Vegfa,Wnt10a
4974	Protein digestion and absorption	10	2.65e-11	ENSRNOP00000004956,ENSRNOP00000005073,ENSRNOP00000005311,ENSRNOP00000012334,ENSRNOP00000027897,ENSRNOP00000027994,ENSRNOP00000039795,ENSRNOP00000047962,ENSRNOP00000054197,ENSRNOP00000054270	Col12a1,Col18a1,Col1a1,Col3a1,Col4a1,Col4a2,Col5a1,Col5a2,Col5a3,Col7a1
4512	ECM-receptor interaction	8	2.76e-08	ENSRNOP00000004956,ENSRNOP00000005073,ENSRNOP00000005311,ENSRNOP00000012334,ENSRNOP00000014785,ENSRNOP00000027897,ENSRNOP00000054197,ENSRNOP00000054270	Col1a1,Col3a1,Col4a1,Col4a2,Col5a1,Col5a2,Col5a3,Itgb1
5146	Amoebiasis	8	1.39e-07	ENSRNOP00000004956,ENSRNOP00000005073,ENSRNOP00000005311,ENSRNOP00000012334,ENSRNOP00000027773,ENSRNOP00000027897,ENSRNOP00000054197,ENSRNOP00000054270	Actn4,Col1a1,Col3a1,Col4a1,Col4a2,Col5a1,Col5a2,Col5a3
5205	Proteoglycans in cancer	10	1.47e-07	ENSRNOP00000005995,ENSRNOP00000006188,ENSRNOP00000008722,ENSRNOP00000014785,ENSRNOP00000019267,ENSRNOP00000022679,ENSRNOP00000023878,ENSRNOP00000026637,ENSRNOP00000026760,ENSRNOP00000042230	Cav2,Hif1a,Igf1,Igf1r,Itgb1,Mmp2,Myc,Stat3,Vegfa,Wnt10a
5206	MicroRNAs in cancer	8	9.56e-07	ENSRNOP00000003077,ENSRNOP00000006188,ENSRNOP00000015482,ENSRNOP00000024430,ENSRNOP00000026212,ENSRNOP00000026637,ENSRNOP00000026760,ENSRNOP00000028143	Dnmt3b,Myc,Notch1,Pdgfra,Pten,Stat3,Vegfa,Vim
5202	Transcriptional misregulation in cancer	8	1.89e-06	ENSRNOP00000005995,ENSRNOP00000006188,ENSRNOP00000012137,ENSRNOP00000018652,ENSRNOP00000019267,ENSRNOP00000019403,ENSRNOP00000040411,ENSRNOP00000057733	Csf1r,Igf1,Igf1r,Myc,Pax3,Pparg,Runx2,Sp1
4611	Platelet activation	7	7.56e-06	ENSRNOP00000004956,ENSRNOP00000005073,ENSRNOP00000005311,ENSRNOP00000012334,ENSRNOP00000014785,ENSRNOP00000016942,ENSRNOP00000027897	Col1a1,Col3a1,Col5a1,Col5a2,Col5a3,Itgb1,Syk
4066	HIF-1 signaling pathway	6	4.61e-05	ENSRNOP00000005995,ENSRNOP00000019192,ENSRNOP00000019267,ENSRNOP00000026637,ENSRNOP00000026760,ENSRNOP00000042230	Hif1a,Hmox1,Igf1,Igf1r,Stat3,Vegfa
5214	Glioma	5	4.75e-05	ENSRNOP00000003077,ENSRNOP00000005995,ENSRNOP00000019267,ENSRNOP00000028143,ENSRNOP00000063822	Calm1,Igf1,Igf1r,Pdgfra,Pten
4015	Rap1 signaling pathway	7	0.000142	ENSRNOP00000003077,ENSRNOP00000005995,ENSRNOP00000014785,ENSRNOP00000019267,ENSRNOP00000026637,ENSRNOP00000040411,ENSRNOP00000063822	Calm1,Csf1r,Igf1,Igf1r,Itgb1,Pdgfra,Vegfa
5222	Small cell lung cancer	5	0.000229	ENSRNOP00000006188,ENSRNOP00000014785,ENSRNOP00000028143,ENSRNOP00000054197,ENSRNOP00000054270	Col4a1,Col4a2,Itgb1,Myc,Pten
4150	mTOR signaling pathway	4	0.00111	ENSRNOP00000005995,ENSRNOP00000026637,ENSRNOP00000028143,ENSRNOP00000042230	Hif1a,Igf1,Pten,Vegfa
4068	FoxO signaling pathway	5	0.00155	ENSRNOP00000005995,ENSRNOP00000019267,ENSRNOP00000023256,ENSRNOP00000026760,ENSRNOP00000028143	Igf1,Igf1r,Pten,Slc2a4,Stat3
4144	Endocytosis	6	0.00159	ENSRNOP00000003077,ENSRNOP00000008722,ENSRNOP00000019267,ENSRNOP00000031927,ENSRNOP00000040411,ENSRNOP00000058593	Cav2,Csf1r,Hspa8,Igf1r,Pdgfra,Smurf1
5218	Melanoma	4	0.00159	ENSRNOP00000003077,ENSRNOP00000005995,ENSRNOP00000019267,ENSRNOP00000028143	Igf1,Igf1r,Pdgfra,Pten
4014	Ras signaling pathway	6	0.00164	ENSRNOP00000003077,ENSRNOP00000005995,ENSRNOP00000019267,ENSRNOP00000026637,ENSRNOP00000040411,ENSRNOP00000063822	Calm1,Csf1r,Igf1,Igf1r,Pdgfra,Vegfa
4612	Antigen processing and presentation	4	0.00187	ENSRNOP00000023628,ENSRNOP00000025064,ENSRNOP00000040859,ENSRNOP00000058593	Canx,Hspa4,Hspa5,Hspa8
5215	Prostate cancer	4	0.00316	ENSRNOP00000003077,ENSRNOP00000005995,ENSRNOP00000019267,ENSRNOP00000028143	Igf1,Igf1r,Pdgfra,Pten
4915	Estrogen signaling pathway	4	0.00319	ENSRNOP00000019403,ENSRNOP00000022679,ENSRNOP00000058593,ENSRNOP00000063822	Calm1,Hspa8,Mmp2,Sp1
5219	Bladder cancer	3	0.00319	ENSRNOP00000006188,ENSRNOP00000022679,ENSRNOP00000026637	Mmp2,Myc,Vegfa
5016	Huntington s disease	5	0.00519	ENSRNOP00000002837,ENSRNOP00000012137,ENSRNOP00000018328,ENSRNOP00000019403,ENSRNOP00000064356	Bdnf,Pparg,Rest,Sp1,Tgm2
4913	Ovarian steroidogenesis	3	0.00691	ENSRNOP00000005995,ENSRNOP00000019267,ENSRNOP00000060874	Igf1,Igf1r,Scarb1
5169	Epstein-Barr virus infection	5	0.00834	ENSRNOP00000006188,ENSRNOP00000016942,ENSRNOP00000024430,ENSRNOP00000026760,ENSRNOP00000058593	Hspa8,Myc,Stat3,Syk,Vim
4152	AMPK signaling pathway	4	0.00968	ENSRNOP00000005995,ENSRNOP00000012137,ENSRNOP00000019267,ENSRNOP00000023256	Igf1,Igf1r,Pparg,Slc2a4
3320	PPAR signaling pathway	3	0.0226	ENSRNOP00000011196,ENSRNOP00000012137,ENSRNOP00000043934	Olr1,Pparg,Ubb
5100	Bacterial invasion of epithelial cells	3	0.0226	ENSRNOP00000008722,ENSRNOP00000010491,ENSRNOP00000014785	Cav2,Itgb1,Sept3
4145	Phagosome	4	0.0244	ENSRNOP00000011196,ENSRNOP00000014785,ENSRNOP00000040859,ENSRNOP00000060874	Canx,Itgb1,Olr1,Scarb1
4350	TGF-beta signaling pathway	3	0.0244	ENSRNOP00000006188,ENSRNOP00000019403,ENSRNOP00000031927	Myc,Smurf1,Sp1
4916	Melanogenesis	3	0.03	ENSRNOP00000021971,ENSRNOP00000023878,ENSRNOP00000063822	Calm1,Tyr,Wnt10a
5216	Thyroid cancer	2	0.0359	ENSRNOP00000006188,ENSRNOP00000012137	Myc,Pparg
5203	Viral carcinogenesis	4	0.0415	ENSRNOP00000016942,ENSRNOP00000018877,ENSRNOP00000026760,ENSRNOP00000027773	Actn4,Il6st,Stat3,Syk
4114	Oocyte meiosis	3	0.0452	ENSRNOP00000005995,ENSRNOP00000019267,ENSRNOP00000063822	Calm1,Igf1,Igf1r
4060	Cytokine-cytokine receptor interaction	4	0.0466	ENSRNOP00000003077,ENSRNOP00000018877,ENSRNOP00000026637,ENSRNOP00000040411	Csf1r,Il6st,Pdgfra,Vegfa
5020	Prion diseases	2	0.0497	ENSRNOP00000025064,ENSRNOP00000026212	Hspa5,Notch1
All genes targeted by downregulated microRNAs were analyzed by KEGG database(https://www.genome.jp/kegg/pathway.html).
